# Supplementary material
Source: PubMed Central journal article supplement (PMC1890478)

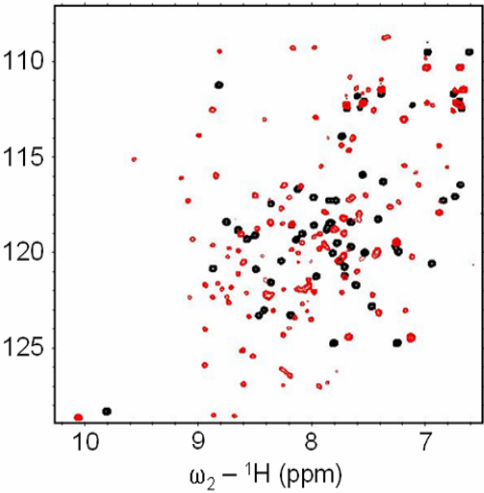

Supplement: pnas_0610716104_1.pdf [file pnas_0610716104_1.pdf]

M 1 2 3 4 5 6 7 8 9 10 11 12

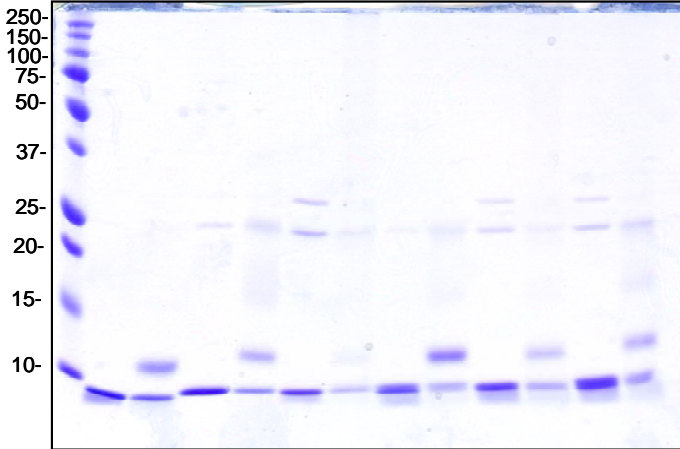

Supplement: pnas_0610716104_2.pdf [file pnas_0610716104_2.pdf]

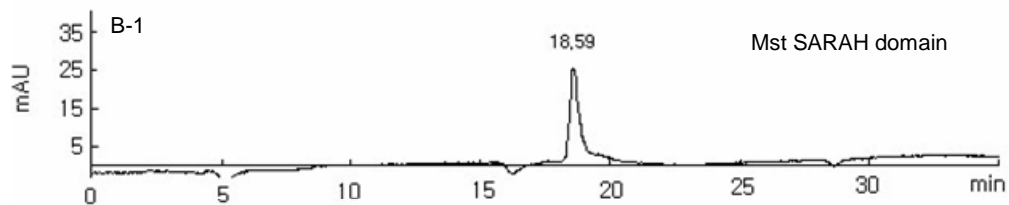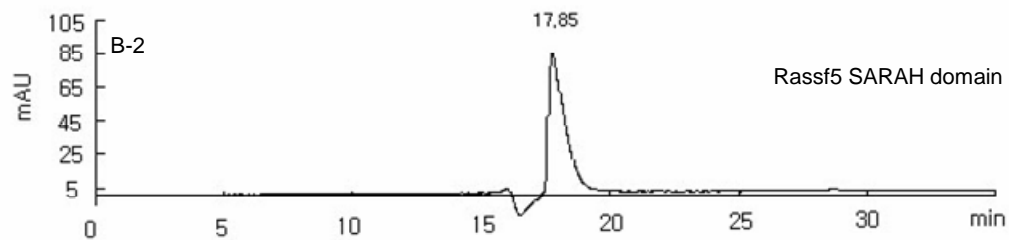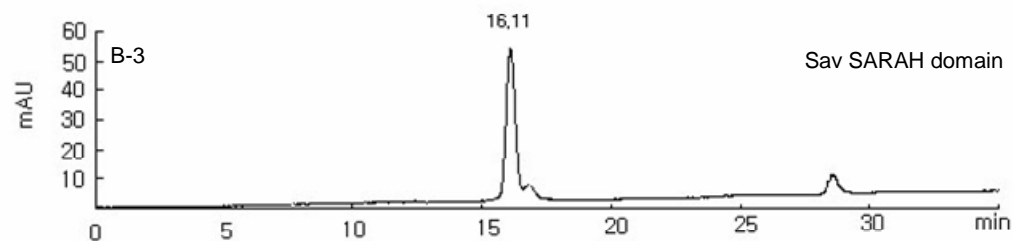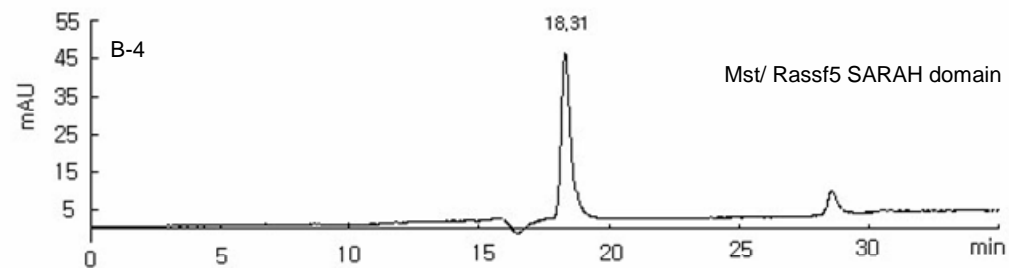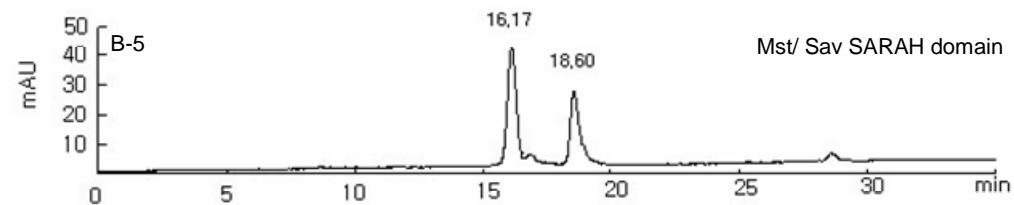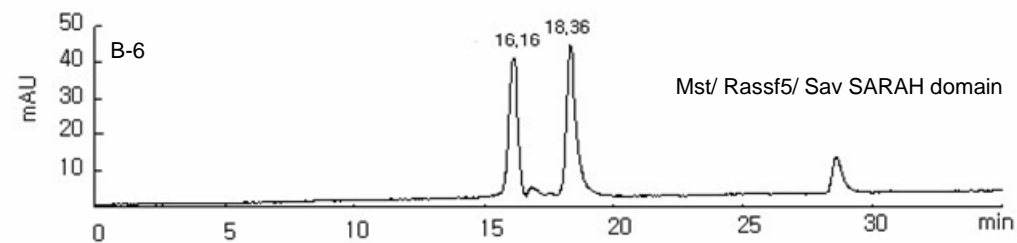

peak at 16.1: void

Supplement: pnas_0610716104_3.pdf [file pnas_0610716104_3.pdf]

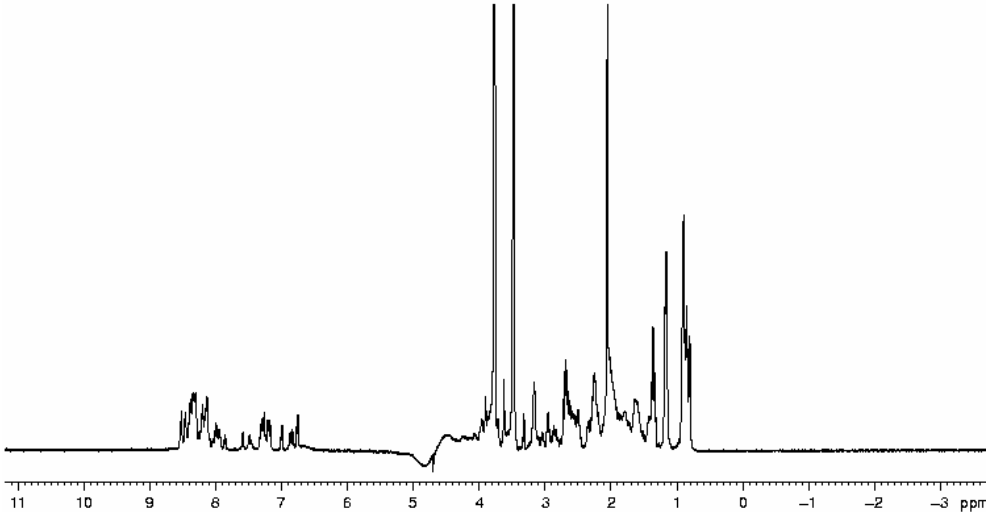

Supplement: pnas_0610716104_4.pdf [file pnas_0610716104_4.pdf]

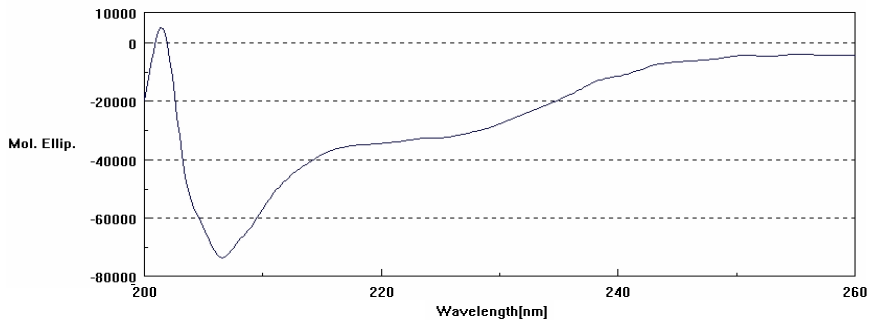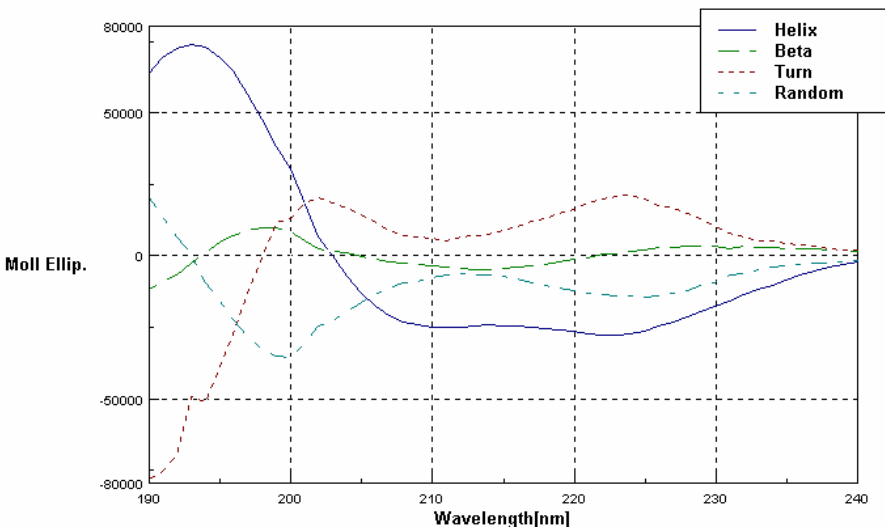

Supplement: pnas_0610716104_5.pdf [file pnas_0610716104_5.pdf]

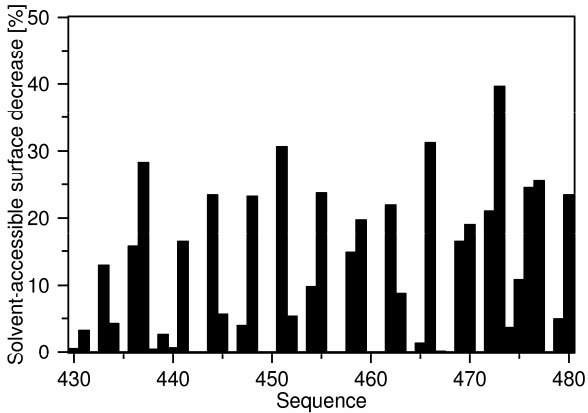

Supplement: pnas_0610716104_6.pdf [file pnas_0610716104_6.pdf]

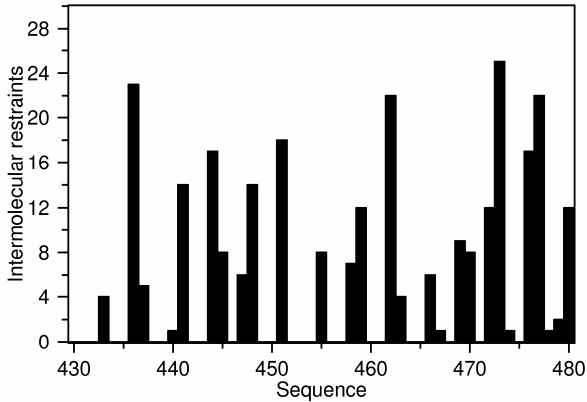

Supplement: pnas_0610716104_7.pdf [file pnas_0610716104_7.pdf]
